# Supplementary material
Source: Springer Nature journal article supplement (https://www.springermedizin.de/resource/supplementary/12958_2003_107_MOESM5_ESM.pdf/9566134)

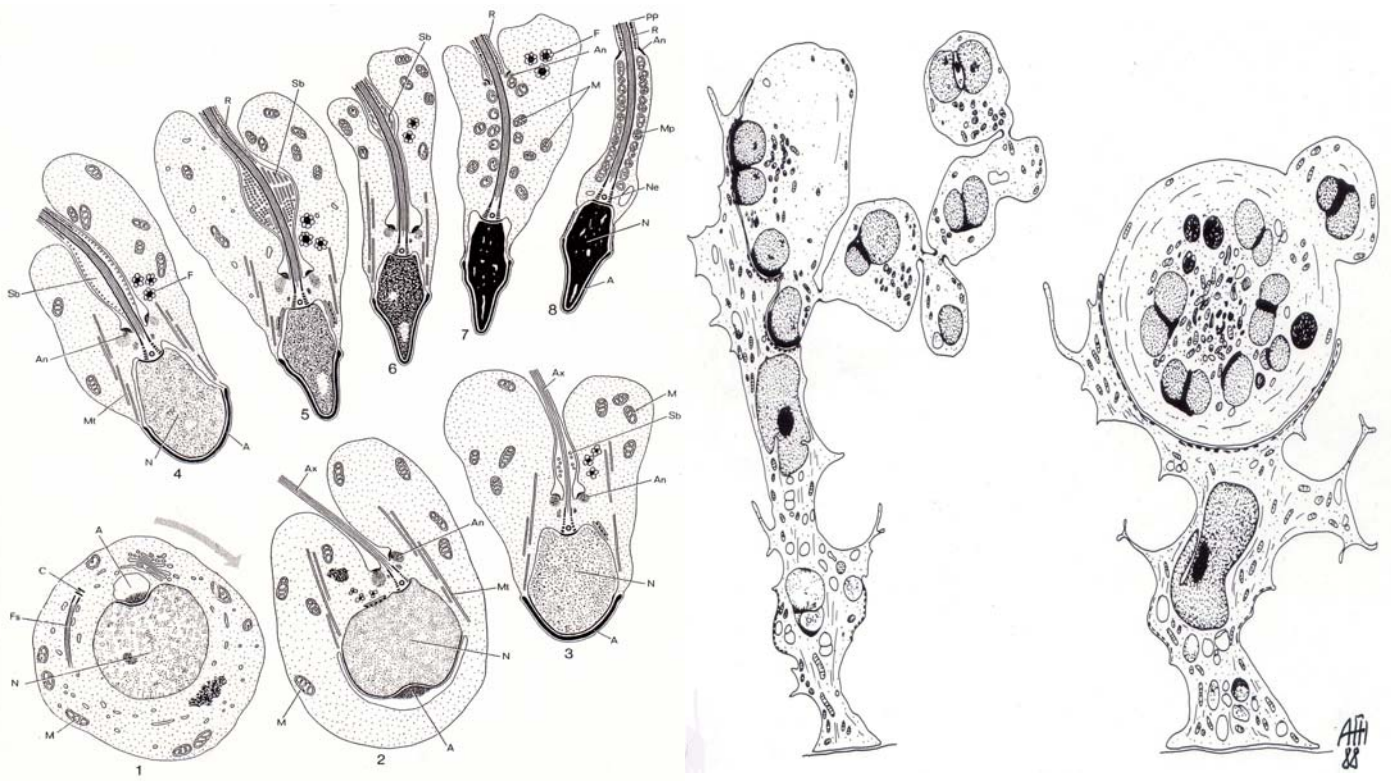

A

B

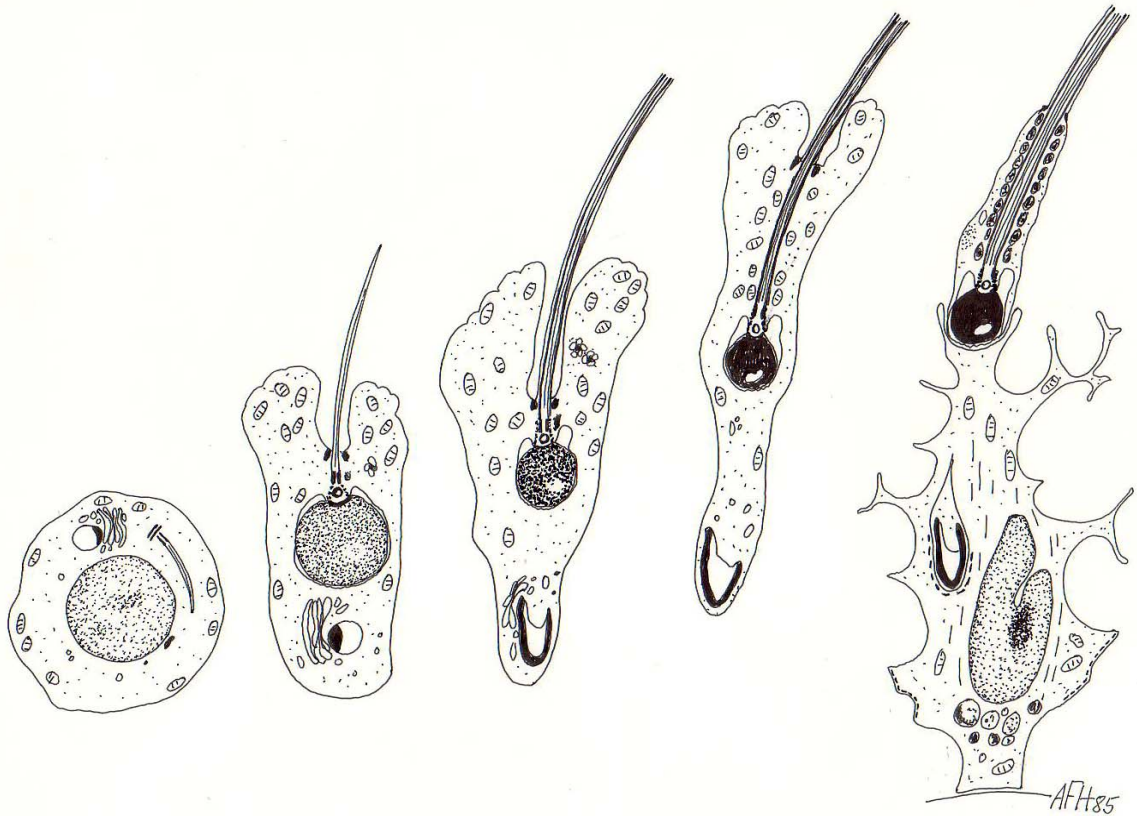

C

AH85

Supplement: MOESM5 [file 9566134]
